# Supplementary material for: Synthesis and self-assembly of poly(ferrocenyldimethylsilane)-block-poly(2-alkyl-2-oxazoline) block copolymers
Source: Royal Society of Chemistry journal article supplement (doi:10.1039/c4py01512f), 2014-12-10
Supplement: c4py01512f1.pdf [file c4py01512f1.pdf]

## Supporting information

# Synthesis and Self-Assembly of Poly(ferrocenyldimethylsilane)- *block-poly(2-alkyl-2-oxazoline)* Block Copolymers

Tobias Rudolph,<sup>1,2</sup> Adam Nunns,<sup>3</sup> Almut Schwenke,<sup>1,2</sup> Felix H. Schacher<sup>1,2,\*</sup>

[1] Laboratory of Organic and Macromolecular Chemistry, Friedrich Schiller University Jena,  
Humboldtstr. 10, 07743 Jena, Germany

E-mail: [felix.schacher@uni-jena.de](mailto:felix.schacher@uni-jena.de)

[2] Jena Center for Soft Matter (JCSM), Friedrich Schiller University Jena, Philosophenweg 7,  
07743 Jena, Germany

[3] School of Chemistry, University of Bristol, Bristol BS8 1TS, U.K

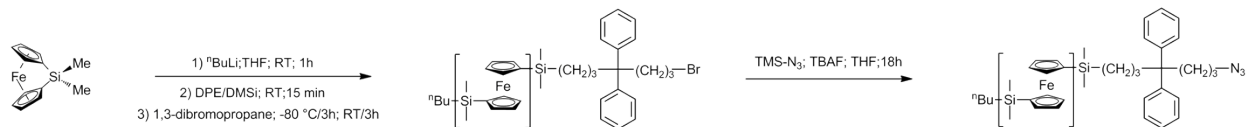

**Figure S1:** Synthesis of azide-functionalized PFDMS-N<sub>3</sub> of different molar mass.

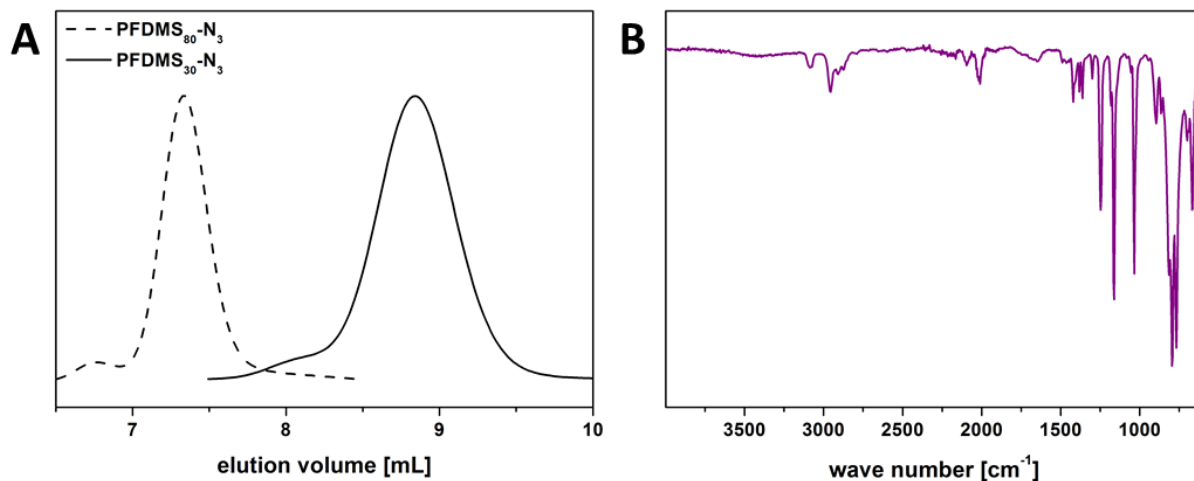

**Figure S2:** A) Comparison of the SEC traces for azide-modified PFDMS-N<sub>3</sub> with two different molar mass of 7 000 g mol<sup>-1</sup> (PFDMS<sub>30</sub>-N<sub>3</sub>; straight black line) and 20 000 g mol<sup>-1</sup> (PFDMS<sub>80</sub>-N<sub>3</sub>; dashed line); B) FT-IR spectrum for PFDMS<sub>30</sub>-N<sub>3</sub>.

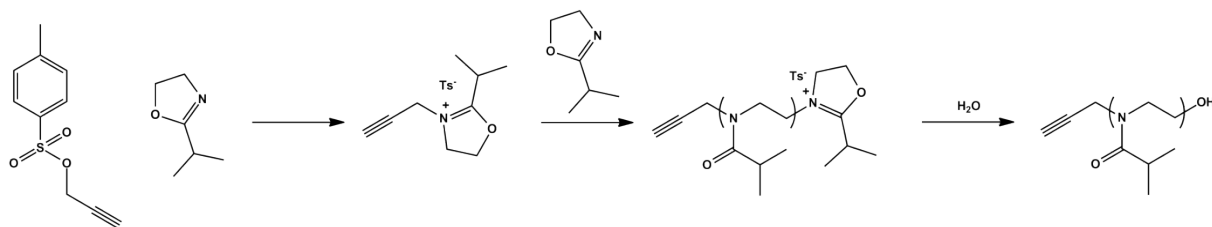

**Figure S3:** Synthesis of alkyne-functionalized PiPrOx *via* CROP initiated by propargyl *p*-toluenesulfonate.

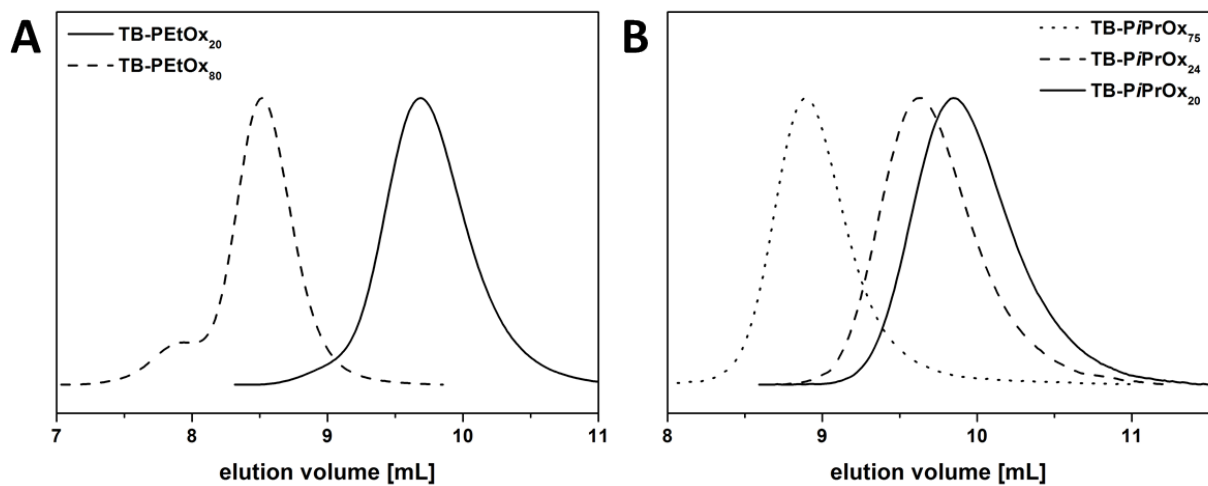

**Figure S4:** Comparison of SEC traces obtained for: A) TB-PEtOx<sub>20</sub> (straight line), TB-PEtOx<sub>80</sub> (dashed line); B) TB-PiPrOx<sub>20</sub> (straight line), TB-PiPrOx<sub>24</sub> (dotted line), and TB-PiPrOx<sub>75</sub> (dashed line).

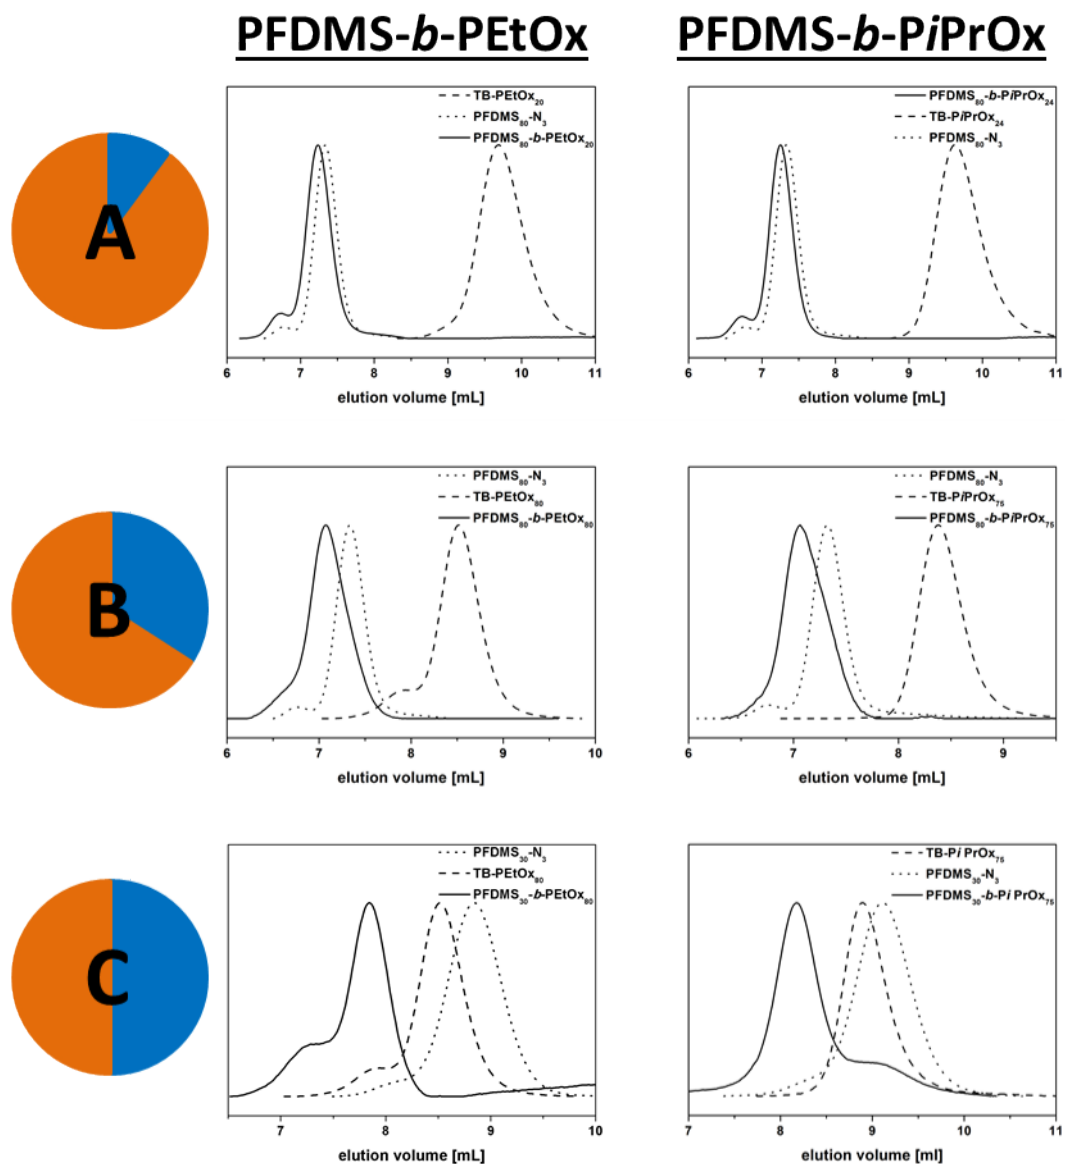

**Figure S5:** Comparison of SEC traces for the CuAAC click reaction between  $\text{PFDMS}_x\text{-N}_3$  (dotted line) and various  $\text{TB-PO}_y$  (dashed line) synthesized block copolymers (straight line) with different ratios: A)  $\text{PFDMS}_{80}\text{-}b\text{-PEtOx}_{20}$  (92/8 wt. %),  $\text{PFDMS}_{80}\text{-}b\text{-PiPrOx}_{24}$  (88/12 wt. %); B)  $\text{PFDMS}_{80}\text{-}b\text{-PEtOx}_{80}$  (71/29 wt. %),  $\text{PFDMS}_{80}\text{-}b\text{-PiPrOx}_{75}$  (70/30 wt. %); C)  $\text{PFDMS}_{30}\text{-}b\text{-PEtOx}_{80}$  (47/53 wt. %),  $\text{PFDMS}_{30}\text{-}b\text{-PiPrOx}_{75}$  (46/54 wt. %).

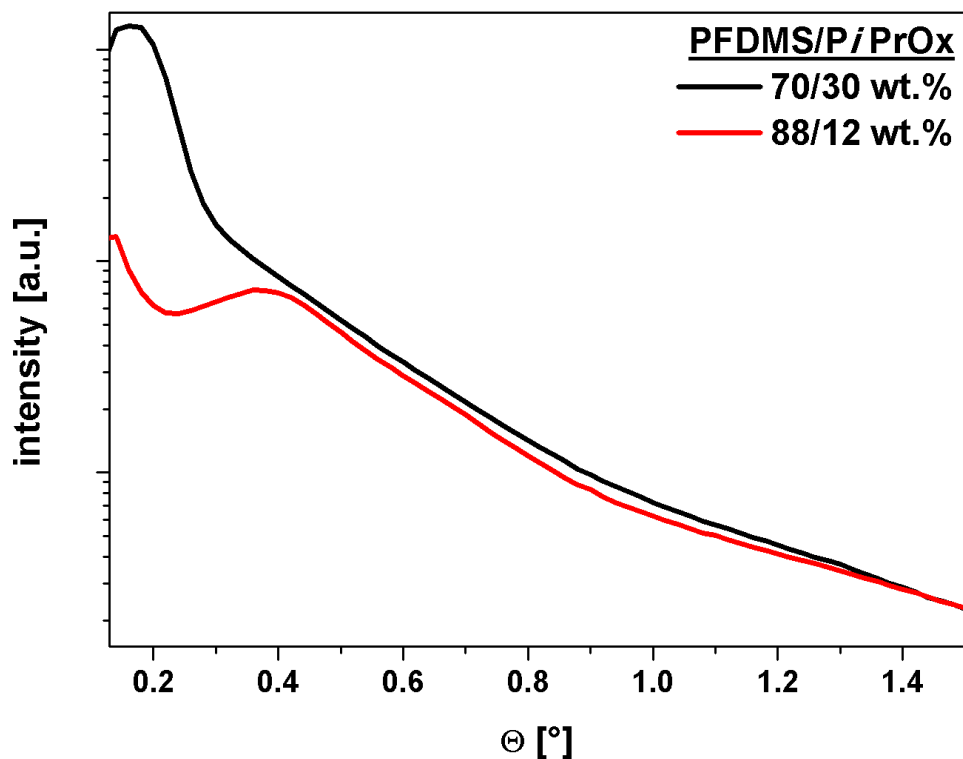

**Figure S6:** Comparison of SAXS patterns for different PFDMS<sub>x</sub>-*b*-PiPrOx<sub>y</sub> diblock copolymers: 70/30 wt. % (PFDMS<sub>80</sub>-*b*-PiPrOx<sub>75</sub>; black curve), 88/12 wt. % (PFDMS<sub>80</sub>-*b*-PiPrOx<sub>24</sub>; red curve).

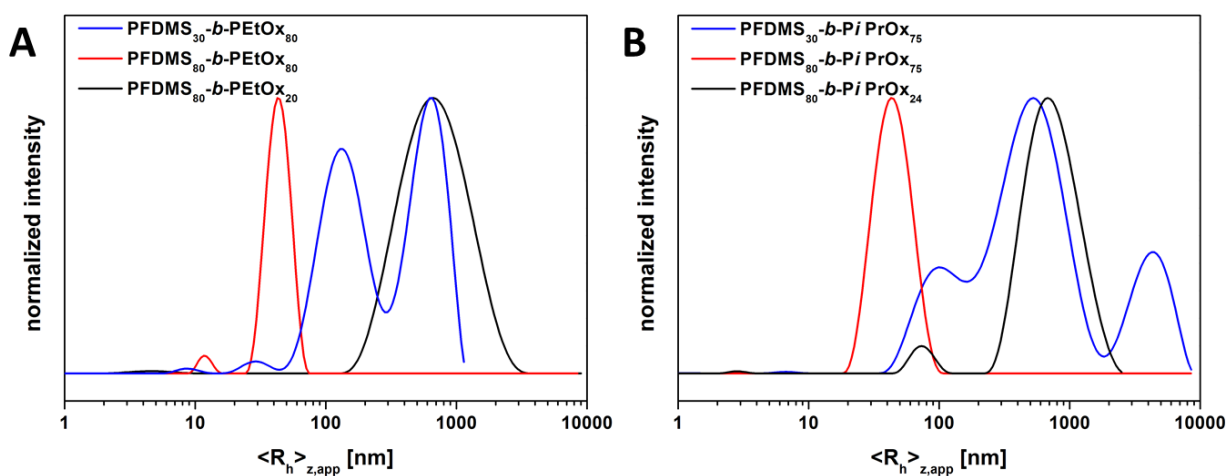

**Figure S7:** Comparison of DLS CONTIN plots for A) PFDMS<sub>80</sub>-*b*-PEtOx<sub>20</sub> (92/8 wt. %;  $\langle R_h \rangle_{z,app} = 670$  nm; black trace), PFDMS<sub>80</sub>-*b*-PEtOx<sub>80</sub> (71/29 wt. %,  $\langle R_h \rangle_{z,app} = 12$  and 43 nm; red trace), PFDMS<sub>30</sub>-*b*-PEtOx<sub>80</sub> (47/53 wt. %;  $\langle R_h \rangle_{z,app} = 9, 30, 135$  and 630 nm; blue trace); B) PFDMS<sub>80</sub>-*b*-PiPrOx<sub>24</sub> (88/12 wt. %;  $\langle R_h \rangle_{z,app} = 73$  and 680 nm; black trace); PFDMS<sub>80</sub>-*b*-PiPrOx<sub>75</sub> (70/30 wt. %;  $\langle R_h \rangle_{z,app} = 45$  nm; red trace); PFDMS<sub>30</sub>-*b*-PiPrOx<sub>75</sub> (46/54 wt. %;  $\langle R_h \rangle_{z,app} = 100, 525$  and 4300 nm; blue trace) at a constant concentration of 0.5 mg mL<sup>-1</sup> in acetone.

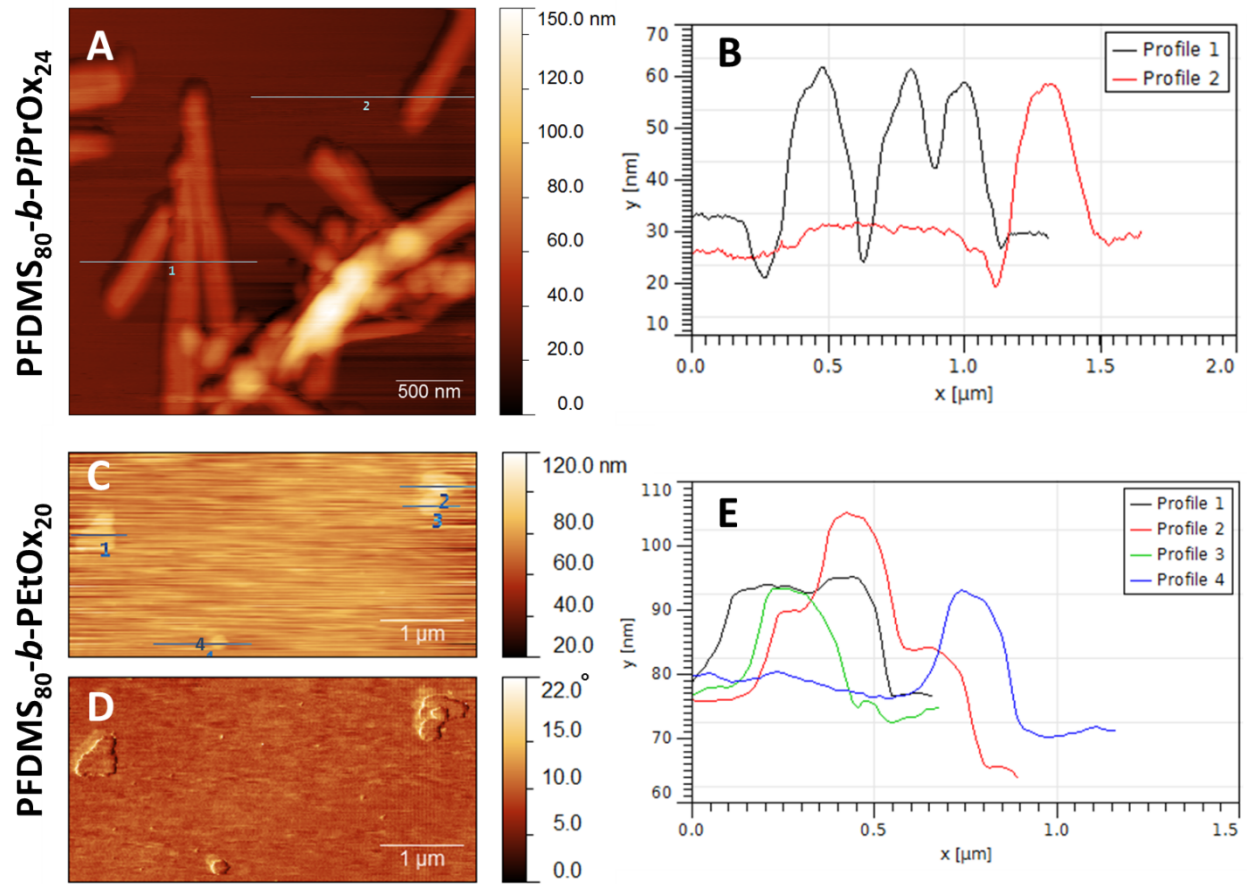

**Figure S8:** Comparison of AFM images for sheet forming block copolymers drop-casted from acetone: Height image (A) of PFDMS<sub>80</sub>-*b*-PiPrOx<sub>24</sub> (88/12 wt. %) and the corresponding height profile (B, ~15-30 nm); height image (C) of PFDMS<sub>80</sub>-*b*-PETox<sub>20</sub> (92/8 wt. %) and the corresponding phase image (D) and the height profile (E, ~15 nm).

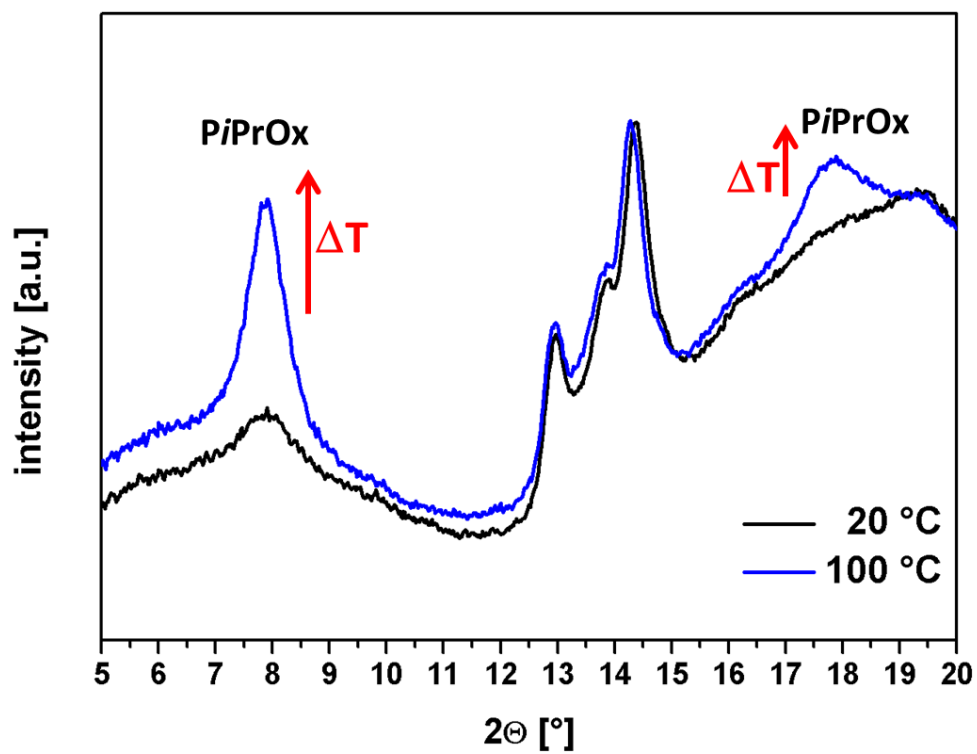

**Figure S9:** Wide angle x-ray scattering for PFDMS<sub>30</sub>-*b*-PiPrOx<sub>75</sub> (46/54 wt.%) at different temperatures: 20 °C (black curve), and after heating to 100 °C (2 h@100 °C; blue curve).
